# Supplementary material for: Determination of Selected Chemical Levels in Room Air and on Surfaces after the Use of Cartridge- and Tank-Based E-Vapor Products or Conventional Cigarettes
Source: PubMed Central journal article supplement (PMC5615506; doi:10.3390/ijerph14090969), 2017-08-28
Supplement: ijerph-14-00969-s001.pdf [file ijerph-14-00969-s001.pdf]

**Table S1.** Absolute levels of RAS constituents ( $\mu\text{g}/\text{m}^3$ ) measured during background (where detected), baseline and product use.

| Constituent (LOQ $\mu\text{g}/\text{m}^3$ ) | Group I<br>(N=9)    | Group II<br>(N=9)    | Group III<br>(N=9)   | Group IV<br>(N=10)   |
|---------------------------------------------|---------------------|----------------------|----------------------|----------------------|
| <b>Nicotine (0.248)</b>                     |                     |                      |                      |                      |
| Baseline                                    | <LOQ                | <LOQ                 | <LOQ                 | <LOQ                 |
| Pre-defined                                 | 0.4763 $\pm$ 0.1618 | 2.8275 $\pm$ 0.4371  | n/a                  | n/a                  |
| <i>Ad libitum</i>                           | 0.3810 $\pm$ 0.0694 | 0.9595 $\pm$ 0.2232  | 1.4725 $\pm$ 0.3177  | 40.6500 $\pm$ 6.3966 |
| <b>Propylene glycol (3.63)</b>              |                     |                      |                      |                      |
| Baseline                                    | 17.338 $\pm$ 2.199  | 63.238 $\pm$ 4.015   | 61.938 $\pm$ 6.216   | 9.763 $\pm$ 1.225    |
| Pre-defined                                 | 62.200 $\pm$ 5.144  | 274.750 $\pm$ 12.230 | n/a                  | n/a                  |
| <i>Ad libitum</i>                           | 50.400 $\pm$ 3.186  | 131.750 $\pm$ 3.862  | 379.000 $\pm$ 15.556 | 65.975 $\pm$ 5.161   |
| <b>Glycerol (4.11)</b>                      |                     |                      |                      |                      |
| Baseline                                    | <LOQ                | <LOQ                 | <LOQ                 | <LOQ                 |
| Pre-defined                                 | 67.888 $\pm$ 16.806 | 126.750 $\pm$ 12.712 | n/a                  | n/a                  |
| <i>Ad libitum</i>                           | 98.900 $\pm$ 28.142 | 78.650 $\pm$ 8.745   | 242.000 $\pm$ 7.616  | <LOQ                 |
| <b>Arsenic (0.123)</b>                      |                     |                      |                      |                      |
| Baseline                                    | <LOQ                | <LOQ                 | <LOQ                 | <LOQ                 |
| Pre-defined                                 | <LOQ                | <LOQ                 | n/a                  | n/a                  |
| <i>Ad libitum</i>                           | <LOQ                | <LOQ                 | <LOQ                 | <LOQ                 |
| <b>Cadmium (0.123)</b>                      |                     |                      |                      |                      |
| Baseline                                    | <LOQ                | <LOQ                 | <LOQ                 | <LOQ                 |
| Pre-defined                                 | <LOQ                | <LOQ                 | n/a                  | n/a                  |
| <i>Ad libitum</i>                           | <LOQ                | <LOQ                 | <LOQ                 | <LOQ                 |
| <b>Chromium (0.123)</b>                     |                     |                      |                      |                      |
| Baseline                                    | 0.0613 $\pm$ 0.0707 | 0.1370 $\pm$ 0.0059  | 0.1203 $\pm$ 0.0825  | 0.0655 $\pm$ 0.0757  |
| Pre-defined                                 | 0.0665 $\pm$ 0.0769 | <LOQ                 | n/a                  | n/a                  |
| <i>Ad libitum</i>                           | 0.0728 $\pm$ 0.0840 | <LOQ                 | 0.0688 $\pm$ 0.0799  | 0.1040 $\pm$ 0.0696  |
| <b>Nickel (0.123)</b>                       |                     |                      |                      |                      |
| Baseline                                    | 0.0358 $\pm$ 0.0715 | 0.2048 $\pm$ 0.1378  | <LOQ                 | <LOQ                 |
| Pre-defined                                 | 0.1100 $\pm$ 0.0746 | 0.0313 $\pm$ 0.0625  | n/a                  | n/a                  |
| <i>Ad libitum</i>                           | <LOQ                | <LOQ                 | <LOQ                 | <LOQ                 |
| <b>Formaldehyde (0.619)</b>                 |                     |                      |                      |                      |
| Background before baseline                  | 2.740 $\pm$ 0.890   | 0.725 $\pm$ 1.450    | 2.603 $\pm$ 0.350    | 2.510 $\pm$ 0.440    |
| Baseline                                    | 3.690 $\pm$ 0.289   | 5.685 $\pm$ 1.710    | 3.433 $\pm$ 0.204    | 4.375 $\pm$ 0.108    |
| Background before pre-defined               | 6.043 $\pm$ 1.922   | 3.970 $\pm$ 0.721    | n/a                  | n/a                  |
| Pre-defined                                 | 5.355 $\pm$ 0.078   | 4.973 $\pm$ 0.340    | n/a                  | n/a                  |
| Background before <i>ad libitum</i>         | 11.795 $\pm$ 2.661  | 6.238 $\pm$ 1.479    | 3.728 $\pm$ 0.296    | 3.500 $\pm$ 0.087    |
| <i>Ad libitum</i>                           | 9.160 $\pm$ 0.995   | 5.823 $\pm$ 0.123    | 3.878 $\pm$ 0.509    | 55.100 $\pm$ 4.113   |
| <b>Crotonaldehyde (0.619)</b>               |                     |                      |                      |                      |
| Baseline                                    | <LOQ                | <LOQ                 | <LOQ                 | <LOQ                 |

|                                      |                                     |                 |                 |                 |                   |
|--------------------------------------|-------------------------------------|-----------------|-----------------|-----------------|-------------------|
|                                      | Pre-defined                         | <LOQ            | <LOQ            | n/a             | n/a               |
|                                      | <i>Ad libitum</i>                   | <LOQ            | <LOQ            | <LOQ            | 1.0935 ± 0.7839   |
| <b>o-Tolualdehyde (0.0149)</b>       |                                     |                 |                 |                 |                   |
|                                      | Baseline                            | <LOQ            | <LOQ            | <LOQ            | <LOQ              |
|                                      | Pre-defined                         | <LOQ            | <LOQ            | n/a             | n/a               |
|                                      | <i>Ad libitum</i>                   | <LOQ            | <LOQ            | <LOQ            | <LOQ              |
| <b>Acetaldehyde (0.619)</b>          |                                     |                 |                 |                 |                   |
|                                      | Background before baseline          | 3.0125 ± 0.7023 | 0.6450 ± 1.2900 | 4.8650 ± 0.4876 | 4.6625 ± 0.1702   |
|                                      | Baseline                            | 3.4638 ± 0.2354 | 2.7975 ± 0.4545 | 3.8275 ± 0.1909 | 4.1025 ± 0.1748   |
|                                      | Background before pre-defined       | 5.2800 ± 1.9407 | 3.6725 ± 0.5538 | n/a             | n/a               |
|                                      | Pre-defined                         | 3.9313 ± 0.3089 | 3.6775 ± 0.3652 | n/a             | n/a               |
|                                      | Background before <i>ad libitum</i> | 8.7350 ± 1.2678 | 5.4750 ± 0.6368 | 4.2850 ± 0.3608 | 5.3400 ± 0.5995   |
|                                      | <i>Ad libitum</i>                   | 6.4075 ± 0.6394 | 7.7288 ± 4.4290 | 5.3825 ± 0.4129 | 110.5000 ± 5.3229 |
| <b>Butyraldehyde (0.698)</b>         |                                     |                 |                 |                 |                   |
|                                      | Baseline                            | <LOQ            | <LOQ            | <LOQ            | <LOQ              |
|                                      | Pre-defined                         | <LOQ            | <LOQ            | n/a             | n/a               |
|                                      | <i>Ad libitum</i>                   | <LOQ            | <LOQ            | <LOQ            | 6.118 ± 0.860     |
| <b>m- and p-Tolualdehyde (1.240)</b> |                                     |                 |                 |                 |                   |
|                                      | Baseline                            | <LOQ            | <LOQ            | <LOQ            | <LOQ              |
|                                      | Pre-defined                         | <LOQ            | <LOQ            | n/a             | n/a               |
|                                      | <i>Ad libitum</i>                   | <LOQ            | <LOQ            | <LOQ            | <LOQ              |
| <b>Acetone (0.619)</b>               |                                     |                 |                 |                 |                   |
|                                      | Background before baseline          | 21.618 ± 29.558 | 3.938 ± 7.875   | NR              | 27.050 ± 8.662    |
|                                      | Baseline                            | 16.013 ± 0.802  | 21.000 ± 5.314  | NR              | 40.925 ± 4.148    |
|                                      | Background before pre-defined       | 35.500 ± 21.324 | 14.943 ± 5.394  | n/a             | n/a               |
|                                      | Pre-defined                         | 25.863 ± 0.477  | 31.050 ± 4.118  | n/a             | n/a               |
|                                      | Background before <i>ad libitum</i> | 41.350 ± 17.666 | 21.625 ± 10.341 | NR              | 19.025 ± 5.405    |
|                                      | <i>Ad libitum</i>                   | 45.588 ± 3.171  | 30.238 ± 5.025  | NR              | 78.600 ± 6.044    |
| <b>Benzaldehyde (0.619)</b>          |                                     |                 |                 |                 |                   |
|                                      | Baseline                            | <LOQ            | <LOQ            | <LOQ            | <LOQ              |
|                                      | Pre-defined                         | <LOQ            | <LOQ            | n/a             | n/a               |
|                                      | <i>Ad libitum</i>                   | <LOQ            | <LOQ            | <LOQ            | 0.5300 ± 1.0600   |
| <b>Propionaldehyde (0.798)</b>       |                                     |                 |                 |                 |                   |
|                                      | Baseline                            | <LOQ            | <LOQ            | <LOQ            | <LOQ              |
|                                      | Pre-defined                         | <LOQ            | <LOQ            | n/a             | n/a               |
|                                      | <i>Ad libitum</i>                   | NR              | <LOQ            | <LOQ            | <LOQ              |
| <b>Isovaleraldehyde (0.619)</b>      |                                     |                 |                 |                 |                   |
|                                      | Baseline                            | <LOQ            | <LOQ            | <LOQ            | <LOQ              |
|                                      | Pre-defined                         | <LOQ            | <LOQ            | n/a             | n/a               |
|                                      | <i>Ad libitum</i>                   | <LOQ            | <LOQ            | <LOQ            | 2.095 ± 0.567     |
| <b>Hexaldehyde (1.200)</b>           |                                     |                 |                 |                 |                   |
|                                      | Baseline                            | <LOQ            | <LOQ            | <LOQ            | <LOQ              |
|                                      | Pre-defined                         | <LOQ            | <LOQ            | n/a             | n/a               |

|                                         |                                     |                  |                 |                  |                   |
|-----------------------------------------|-------------------------------------|------------------|-----------------|------------------|-------------------|
|                                         | <i>Ad libitum</i>                   | 2.0698 ± 0.5217  | <LOQ            | <LOQ             | 3.2713 ± 0.3696   |
| <b>Valeraldehyde (0.619)</b>            |                                     |                  |                 |                  |                   |
|                                         | Baseline                            | <LOQ             | <LOQ            | <LOQ             | <LOQ              |
|                                         | Pre-defined                         | <LOQ             | <LOQ            | n/a              | n/a               |
|                                         | <i>Ad libitum</i>                   | <LOQ             | <LOQ            | <LOQ             | 6.095 ± 0.887     |
| <b>2,5-Dimethylbenzaldehyde (0.884)</b> |                                     |                  |                 |                  |                   |
|                                         | Baseline                            | <LOQ             | <LOQ            | <LOQ             | <LOQ              |
|                                         | Pre-defined                         | <LOQ             | <LOQ            | n/a              | n/a               |
|                                         | <i>Ad libitum</i>                   | <LOQ             | <LOQ            | <LOQ             | 4.538 ± 0.843     |
| <b>Methyl ethyl ketone (1.45)</b>       |                                     |                  |                 |                  |                   |
|                                         | Background before baseline          | 6.7150 ± 1.8311  | 2.2425 ± 2.7019 | 10.6700 ± 1.3361 | 9.6150 ± 1.1676   |
|                                         | Baseline                            | 5.1450 ± 0.7422  | 4.1088 ± 0.9380 | 6.9400 ± 1.1038  | 7.5450 ± 0.5572   |
|                                         | Background before pre-defined       | 7.2200 ± 1.2561  | 4.4925 ± 0.6173 | n/a              | n/a               |
|                                         | Pre-defined                         | 7.1463 ± 1.9858  | 4.3075 ± 0.3774 | n/a              | n/a               |
|                                         | Background before <i>ad libitum</i> | 11.7650 ± 1.4732 | 5.4525 ± 2.2910 | 8.3300 ± 1.4816  | 7.5025 ± 0.7192   |
|                                         | <i>Ad libitum</i>                   | 9.0200 ± 0.8979  | 5.9000 ± 0.6691 | 7.4575 ± 0.9666  | 24.4750 ± 2.1991  |
| <b>Acrolein (0.619)</b>                 |                                     |                  |                 |                  |                   |
|                                         | Baseline                            | <LOQ             | <LOQ            | <LOQ             | <LOQ              |
|                                         | Pre-defined                         | <LOQ             | <LOQ            | n/a              | n/a               |
|                                         | <i>Ad libitum</i>                   | <LOQ             | <LOQ            | <LOQ             | <LOQ              |
| <b>1,3-Butadiene (0.194)</b>            |                                     |                  |                 |                  |                   |
|                                         | Baseline                            | <LOQ             | <LOQ            | <LOQ             | <LOQ              |
|                                         | Pre-defined                         | <LOQ             | <LOQ            | n/a              | n/a               |
|                                         | <i>Ad libitum</i>                   | <LOQ             | <LOQ            | <LOQ             | 10.5550 ± 0.5709  |
| <b>Benzene (0.281)</b>                  |                                     |                  |                 |                  |                   |
|                                         | Baseline                            | 0.5843 ± 0.0280  | 1.4305 ± 0.1778 | 0.9145 ± 0.0474  | 2.2685 ± 0.0669   |
|                                         | Pre-defined                         | 0.8338 ± 0.0240  | 0.6823 ± 0.0075 | n/a              | n/a               |
|                                         | <i>Ad libitum</i>                   | 0.5400 ± 0.0039  | 0.7025 ± 0.1280 | 1.0605 ± 0.0152  | 15.5075 ± 0.4649  |
| <b>Isoprene (0.243)</b>                 |                                     |                  |                 |                  |                   |
|                                         | Baseline                            | 7.4870 ± 0.4478  | 6.4588 ± 0.1464 | 7.5715 ± 0.1687  | 7.8865 ± 0.2324   |
|                                         | Pre-defined                         | 9.2058 ± 0.2934  | 7.0130 ± 0.2909 | n/a              | n/a               |
|                                         | <i>Ad libitum</i>                   | 7.0823 ± 1.8117  | 6.2833 ± 1.6497 | 9.4103 ± 0.2820  | 175.7000 ± 8.0403 |
| <b>Toluene (0.330)</b>                  |                                     |                  |                 |                  |                   |
|                                         | Baseline                            | 1.0908 ± 0.2644  | 2.2078 ± 0.2517 | 2.0225 ± 0.4056  | 3.8565 ± 0.1952   |
|                                         | Pre-defined                         | 2.9933 ± 0.3542  | 0.1883 ± 0.2192 | n/a              | n/a               |
|                                         | <i>Ad libitum</i>                   | 1.5220 ± 0.2453  | 0.6803 ± 0.1808 | 2.1505 ± 0.0817  | 34.6825 ± 1.0908  |
| <b>Furan (0.178)</b>                    |                                     |                  |                 |                  |                   |
|                                         | Baseline                            | <LOQ             | <LOQ            | <LOQ             | <LOQ              |
|                                         | Pre-defined                         | <LOQ             | <LOQ            | n/a              | n/a               |
|                                         | <i>Ad libitum</i>                   | <LOQ             | <LOQ            | <LOQ             | 12.078 ± 0.497    |
| <b>Ethylene oxide (0.628)</b>           |                                     |                  |                 |                  |                   |
|                                         | Baseline                            | <LOQ             | <LOQ            | <LOQ             | <LOQ              |
|                                         | Pre-defined                         | <LOQ             | <LOQ            | n/a              | n/a               |

|                                |                   |      |      |      |                 |
|--------------------------------|-------------------|------|------|------|-----------------|
|                                | <i>Ad libitum</i> | <LOQ | <LOQ | <LOQ | <LOQ            |
| <b>Vinyl chloride (0.222)</b>  |                   |      |      |      |                 |
|                                | Baseline          | <LOQ | <LOQ | <LOQ | <LOQ            |
|                                | Pre-defined       | <LOQ | <LOQ | n/a  | n/a             |
|                                | <i>Ad libitum</i> | <LOQ | <LOQ | <LOQ | 0.1138 ± 0.2275 |
| <b>Propylene oxide (0.826)</b> |                   |      |      |      |                 |
|                                | Baseline          | <LOQ | <LOQ | <LOQ | <LOQ            |
|                                | Pre-defined       | <LOQ | <LOQ | n/a  | n/a             |
|                                | <i>Ad libitum</i> | <LOQ | <LOQ | <LOQ | <LOQ            |
| <b>Nitromethane (4.33)</b>     |                   |      |      |      |                 |
|                                | Baseline          | <LOQ | <LOQ | <LOQ | <LOQ            |
|                                | Pre-defined       | <LOQ | <LOQ | n/a  | n/a             |
|                                | <i>Ad libitum</i> | <LOQ | <LOQ | <LOQ | <LOQ            |
| <b>2-Nitropropane (6.33)</b>   |                   |      |      |      |                 |
|                                | Baseline          | <LOQ | <LOQ | <LOQ | <LOQ            |
|                                | Pre-defined       | <LOQ | <LOQ | n/a  | n/a             |
|                                | <i>Ad libitum</i> | <LOQ | <LOQ | <LOQ | <LOQ            |
| <b>Vinyl acetate (6.11)</b>    |                   |      |      |      |                 |
|                                | Baseline          | <LOQ | <LOQ | <LOQ | <LOQ            |
|                                | Pre-defined       | <LOQ | <LOQ | n/a  | n/a             |
|                                | <i>Ad libitum</i> | <LOQ | <LOQ | <LOQ | <LOQ            |
| <b>Ethylbenzene (0.378)</b>    |                   |      |      |      |                 |
|                                | Baseline          | <LOQ | <LOQ | <LOQ | 1.0978 ± 0.0296 |
|                                | Pre-defined       | <LOQ | <LOQ | n/a  | n/a             |
|                                | <i>Ad libitum</i> | <LOQ | <LOQ | <LOQ | 4.6200 ± 0.1589 |

Values are means of four samplers ± SD. Note: N: number of participants in the group; n/a: not applicable; NR: not reportable, compound was not quantifiable due to unknown matrix interferences;

<LOQ: below the level of quantification.

**Table S2.** Absolute levels of RAS constituents ( $\mu\text{g}/\text{m}^3$ ) measured during background (where detected), baseline and product use conditions, for all groups, for each of the four sampling port.

| Constituent (LOQ $\mu\text{g}/\text{m}^3$ ) | Group I<br>(N = 9)           | Group II<br>(N = 9)            | Group III<br>(N=9)             | Group IV<br>(N=10)             |
|---------------------------------------------|------------------------------|--------------------------------|--------------------------------|--------------------------------|
| Condition                                   |                              |                                |                                |                                |
| Nicotine (0.248)                            |                              |                                |                                |                                |
| Baseline                                    | <LOQ, <LOQ, <LOQ, <LOQ       | <LOQ, <LOQ, <LOQ, <LOQ         | <LOQ, <LOQ, <LOQ, <LOQ         | <LOQ, <LOQ, <LOQ, <LOQ         |
| Pre-defined                                 | 0.294, 0.611, 0.386, 0.614   | 2.280, 3.350, 2.850, 2.830     | n/a                            | n/a                            |
| <i>Ad libitum</i>                           | 0.315, 0.376, 0.355, 0.478   | 0.992, 0.687, 0.929, 1.230     | 1.220, 1.190, 1.650, 1.830     | 34.700, 36.100, 43.500, 48.300 |
| Propylene glycol (3.63)                     |                              |                                |                                |                                |
| Baseline                                    | 17.60, 15.70, 15.70, 20.35   | 66.30, 57.40, 63.90, 65.35     | 59.10, 55.30, 63.60, 69.75     | 9.02, 8.43, 10.70, 10.90       |
| Pre-defined                                 | 61.20, 63.95, 55.70, 67.95   | 257.00, 279.00, 278.00, 285.00 | n/a                            | n/a                            |
| <i>Ad libitum</i>                           | 47.90, 50.00, 48.70, 55.00   | 128.00, 129.00, 134.00, 136.00 | 361.00, 372.00, 396.00, 387.00 | 59.70, 64.30, 68.20, 71.70     |
| Glycerol (4.11)                             |                              |                                |                                |                                |
| Baseline                                    | <LOQ, <LOQ, <LOQ, <LOQ       | <LOQ, <LOQ, <LOQ, <LOQ         | <LOQ, <LOQ, <LOQ, <LOQ         | <LOQ, <LOQ, <LOQ, <LOQ         |
| Pre-defined                                 | 62.90, 90.90, 50.80, 66.95   | 112.00, 143.00, 127.00, 125.00 | n/a                            | n/a                            |
| <i>Ad libitum</i>                           | 68.60, 136.00, 90.10, 100.90 | 70.20, 73.80, 80.50, 90.10     | 236.00, 250.00, 247.00, 235.00 | <LOQ, <LOQ, <LOQ, <LOQ         |
| Arsenic (0.123)                             |                              |                                |                                |                                |
| Baseline                                    | <LOQ, <LOQ, <LOQ, <LOQ       | <LOQ, <LOQ, <LOQ, <LOQ         | <LOQ, <LOQ, <LOQ, <LOQ         | <LOQ, <LOQ, <LOQ, <LOQ         |
| Pre-defined                                 | <LOQ, <LOQ, <LOQ, <LOQ       | <LOQ, <LOQ, <LOQ, <LOQ         | n/a                            | n/a                            |
| <i>Ad libitum</i>                           | <LOQ, <LOQ, <LOQ, <LOQ       | <LOQ, <LOQ, <LOQ, <LOQ         | <LOQ, <LOQ, <LOQ, <LOQ         | <LOQ, <LOQ, <LOQ, <LOQ         |
| Cadmium (0.123)                             |                              |                                |                                |                                |
| Baseline                                    | <LOQ, <LOQ, <LOQ, <LOQ       | <LOQ, <LOQ, <LOQ, <LOQ         | <LOQ, <LOQ, <LOQ, <LOQ         | <LOQ, <LOQ, <LOQ, <LOQ         |
| Pre-defined                                 | <LOQ, <LOQ, <LOQ, <LOQ       | <LOQ, <LOQ, <LOQ, <LOQ         | n/a                            | n/a                            |
| <i>Ad libitum</i>                           | <LOQ, <LOQ, <LOQ, <LOQ       | <LOQ, <LOQ, <LOQ, <LOQ         | <LOQ, <LOQ, <LOQ, <LOQ         | <LOQ, <LOQ, <LOQ, <LOQ         |
| Chromium (0.123)                            |                              |                                |                                |                                |
| Baseline                                    | 0.124, <LOQ, <LOQ, 0.121     | 0.141, 0.136, 0.129, 0.142     | 0.133, 0.175, 0.173, <LOQ      | 0.133, 0.129, <LOQ, <LOQ       |
| Pre-defined                                 | <LOQ, 0.128, 0.138, <LOQ     | <LOQ, <LOQ, <LOQ, <LOQ         | n/a                            | n/a                            |
| <i>Ad libitum</i>                           | 0.145, <LOQ, 0.146, <LOQ     | <LOQ, <LOQ, <LOQ, <LOQ         | 0.126, 0.149, <LOQ, <LOQ       | 0.139, 0.146, 0.131, <LOQ      |
| Nickel (0.123)                              |                              |                                |                                |                                |
| Baseline                                    | 0.143, <LOQ, <LOQ, <LOQ      | <LOQ, 0.285, 0.246, 0.288      | <LOQ, <LOQ, <LOQ, <LOQ         | <LOQ, <LOQ, <LOQ, <LOQ         |
| Pre-defined                                 | 0.163, < LOQ, 0.13, 0.147    | <LOQ, 0.125, <LOQ, <LOQ        | n/a                            | n/a                            |
| <i>Ad libitum</i>                           | <LOQ, <LOQ, <LOQ, <LOQ       | <LOQ, <LOQ, <LOQ, <LOQ         | <LOQ, <LOQ, <LOQ, <LOQ         | <LOQ, <LOQ, <LOQ, <LOQ         |
| Formaldehyde (0.619)                        |                              |                                |                                |                                |
| Background before baseline                  | 4.01, 1.96, 2.63, 2.36       | <LOQ, <LOQ, 2.90, <LOQ         | 2.18, 2.48, 2.76, 2.99         | 2.90, 2.37, 1.95, 2.82         |
| Baseline                                    | 3.59, 3.50, 3.55, 4.12       | 5.84, 4.27, 8.04, 4.59         | 3.49, 3.67, 3.18, 3.39         | 4.33, 4.28, 4.53, 4.36         |
| Background before pre-defined               | 5.25, 8.86, 5.51, 4.55       | 2.92, 4.47, 4.08, 4.41         | n/a                            | n/a                            |
| Pre-defined                                 | 5.36, 5.26, 5.45, 5.35       | 4.75, 5.42, 5.05, 4.67         | n/a                            | n/a                            |
| Background before <i>ad libitum</i>         | 10.10, 14.80, 13.20, 9.08    | 4.27, 5.97, 7.60, 7.11         | 4.13, 3.49, 3.52, 3.77         | 3.58, 3.57, 3.43, 3.42         |
| <i>Ad libitum</i>                           | 9.78, 8.08, 8.58, 10.20      | 5.98, 5.82, 5.81, 5.68         | 3.94, 3.14, 4.24, 4.19         | 50.00, 55.80, 54.60, 60.00     |

|                                     |                             |                             |                            |                                    |                              |
|-------------------------------------|-----------------------------|-----------------------------|----------------------------|------------------------------------|------------------------------|
| Crotonaldehyde (0.619)              |                             |                             |                            |                                    |                              |
| Baseline                            | <LOQ, <LOQ, <LOQ, <LOQ      | <LOQ, <LOQ, <LOQ, <LOQ      | <LOQ, <LOQ, <LOQ, <LOQ     | <LOQ, <LOQ, <LOQ, <LOQ             | <LOQ, <LOQ, <LOQ, <LOQ       |
| Pre-defined                         | <LOQ, <LOQ, <LOQ, <LOQ      | <LOQ, <LOQ, <LOQ, <LOQ      | <LOQ, <LOQ, <LOQ, <LOQ     | n/a                                | n/a                          |
| <i>Ad libitum</i>                   | <LOQ, <LOQ, <LOQ, <LOQ      | <LOQ, <LOQ, <LOQ, <LOQ      | <LOQ, <LOQ, <LOQ, <LOQ     | <LOQ, <LOQ, <LOQ, <LOQ             | 1.315, 1.199, <LOQ, 1.860    |
| o-Tolualdehyde (0.0149)             |                             |                             |                            |                                    |                              |
| Baseline                            | <LOQ, <LOQ, <LOQ, <LOQ      | <LOQ, <LOQ, <LOQ, <LOQ      | <LOQ, <LOQ, <LOQ, <LOQ     | <LOQ, <LOQ, <LOQ, <LOQ             | <LOQ, <LOQ, <LOQ, <LOQ       |
| Pre-defined                         | <LOQ, <LOQ, <LOQ, <LOQ      | <LOQ, <LOQ, <LOQ, <LOQ      | <LOQ, <LOQ, <LOQ, <LOQ     | n/a                                | n/a                          |
| <i>Ad libitum</i>                   | <LOQ, <LOQ, <LOQ, <LOQ      | <LOQ, <LOQ, <LOQ, <LOQ      | <LOQ, <LOQ, <LOQ, <LOQ     | <LOQ, <LOQ, <LOQ, <LOQ             | <LOQ, <LOQ, <LOQ, <LOQ       |
| Acetaldehyde (0.619)                |                             |                             |                            |                                    |                              |
| Background before baseline          | 3.940, 2.270, 2.760, 3.080  | <LOQ, <LOQ, 2.580, <LOQ     | 4.340, 5.440, 5.070, 4.610 | 4.480, 4.620, 4.890, 4.660         |                              |
| Baseline                            | 3.585, 3.400, 3.165, 3.705  | 2.830, 2.675, 3.390, 2.295  | 4.030, 3.870, 3.570, 3.840 | 3.850, 4.220, 4.120, 4.220         |                              |
| Background before pre-defined       | 3.820, 7.910, 5.580, 3.810  | 2.930, 3.570, 4.070, 4.120  | n/a                        | n/a                                |                              |
| Pre-defined                         | 4.030, 3.630, 3.745, 4.320  | 3.390, 3.670, 4.195, 3.455  | n/a                        | n/a                                |                              |
| Background before <i>ad libitum</i> | 8.510, 8.450, 10.500, 7.480 | 4.640, 5.430, 5.660, 6.170  | 4.040, 4.270, 4.030, 4.800 | 5.050, 6.130, 4.740, 5.440         |                              |
| <i>Ad libitum</i>                   | 6.585, 5.745, 6.085, 7.215  | 4.560, 5.995, 6.070, 14.290 | 5.210, 4.890, 5.810, 5.620 | 104.000, 110.000, 111.000, 117.000 |                              |
| Butyraldehyde (0.698)               |                             |                             |                            |                                    |                              |
| Baseline                            | <LOQ, <LOQ, <LOQ, <LOQ      | <LOQ, <LOQ, <LOQ, <LOQ      | <LOQ, <LOQ, <LOQ, <LOQ     | <LOQ, <LOQ, <LOQ, <LOQ             | <LOQ, <LOQ, <LOQ, <LOQ       |
| Pre-defined                         | <LOQ, <LOQ, <LOQ, <LOQ      | <LOQ, <LOQ, <LOQ, <LOQ      | <LOQ, <LOQ, <LOQ, <LOQ     | n/a                                | n/a                          |
| <i>Ad libitum</i>                   | <LOQ, <LOQ, <LOQ, <LOQ      | <LOQ, <LOQ, <LOQ, <LOQ      | <LOQ, <LOQ, <LOQ, <LOQ     | <LOQ, <LOQ, <LOQ, <LOQ             | 5.45, 5.70, 7.37, 5.95       |
| m- and p-Tolualdehyde (1.240)       |                             |                             |                            |                                    |                              |
| Baseline                            | <LOQ, <LOQ, <LOQ, <LOQ      | <LOQ, <LOQ, <LOQ, <LOQ      | <LOQ, <LOQ, <LOQ, <LOQ     | <LOQ, <LOQ, <LOQ, <LOQ             | <LOQ, <LOQ, <LOQ, <LOQ       |
| Pre-defined                         | <LOQ, <LOQ, <LOQ, <LOQ      | <LOQ, <LOQ, <LOQ, <LOQ      | <LOQ, <LOQ, <LOQ, <LOQ     | n/a                                | n/a                          |
| <i>Ad libitum</i>                   | <LOQ, <LOQ, <LOQ, <LOQ      | <LOQ, <LOQ, <LOQ, <LOQ      | <LOQ, <LOQ, <LOQ, <LOQ     | <LOQ, <LOQ, <LOQ, <LOQ             | <LOQ, <LOQ, <LOQ, <LOQ       |
| Acetone (0.619)                     |                             |                             |                            |                                    |                              |
| Background before baseline          | 65.30, 9.57, 0.00, 11.60    | <LOQ, <LOQ, 15.75, <LOQ     | NR, NR, NR, NR             | 31.80, 27.60, 34.10, 14.70         |                              |
| Baseline                            | 16.10, 14.95, 16.10, 16.90  | 23.00, 20.30, 26.65, 14.05  | NR, NR, NR, NR             | 35.40, 45.30, 42.30, 40.70         |                              |
| Background before pre-defined       | 23.10, 38.40, 64.30, 16.20  | 8.87, 14.20, 14.70, 22.00   | n/a                        | n/a                                |                              |
| Pre-defined                         | 25.15, 26.15, 26.10, 26.05  | 28.65, 33.30, 35.60, 26.65  | n/a                        | n/a                                |                              |
| Background before <i>ad libitum</i> | 36.40, 33.10, 67.40, 28.50  | 11.80, 17.90, 20.70, 36.10  | NR, NR, NR, NR             | 19.70, 11.30, 23.70, 21.40         |                              |
| <i>Ad libitum</i>                   | 42.35, 45.10, 49.95, 44.95  | 28.05, 28.00, 27.15, 37.75  | NR, NR, NR, NR             | 71.40, 82.70, 75.90, 84.40         |                              |
| Benzaldehyde (0.619)                |                             |                             |                            |                                    |                              |
| Baseline                            | <LOQ, <LOQ, <LOQ, <LOQ      | <LOQ, <LOQ, <LOQ, <LOQ      | <LOQ, <LOQ, <LOQ, <LOQ     | <LOQ, <LOQ, <LOQ, <LOQ             | <LOQ, <LOQ, <LOQ, <LOQ       |
| Pre-defined                         | <LOQ, <LOQ, <LOQ, <LOQ      | <LOQ, <LOQ, <LOQ, <LOQ      | <LOQ, <LOQ, <LOQ, <LOQ     | n/a                                | n/a                          |
| <i>Ad libitum</i>                   | <LOQ, <LOQ, <LOQ, <LOQ      | <LOQ, <LOQ, <LOQ, <LOQ      | <LOQ, <LOQ, <LOQ, <LOQ     | <LOQ, <LOQ, <LOQ, <LOQ             | <LOQ, <LOQ, <LOQ, <LOQ, 2.12 |
| Propionaldehyde (0.798)             |                             |                             |                            |                                    |                              |
| Baseline                            | <LOQ, <LOQ, <LOQ, <LOQ      | NR, <LOQ, NR, <LOQ          | <LOQ, <LOQ, <LOQ, <LOQ     | <LOQ, <LOQ, <LOQ, <LOQ             | <LOQ, <LOQ, <LOQ, <LOQ       |
| Pre-defined                         | <LOQ, <LOQ, <LOQ, <LOQ      | <LOQ, NR, <LOQ, <LOQ        | n/a                        | n/a                                | n/a                          |
| <i>Ad libitum</i>                   | NR, NR, NR, NR              | <LOQ, <LOQ, <LOQ, <LOQ      | <LOQ, <LOQ, <LOQ, <LOQ     | <LOQ, <LOQ, <LOQ, <LOQ             | <LOQ, <LOQ, <LOQ, <LOQ       |
| Isovaleraldehyde (0.619)            |                             |                             |                            |                                    |                              |

|                                     |                               |                            |                              |                                |
|-------------------------------------|-------------------------------|----------------------------|------------------------------|--------------------------------|
| Baseline                            | <LOQ, <LOQ, <LOQ, <LOQ        | <LOQ, <LOQ, <LOQ, <LOQ     | <LOQ, <LOQ, <LOQ, <LOQ       | <LOQ, <LOQ, <LOQ, <LOQ         |
| Pre-defined                         | <LOQ, <LOQ, <LOQ, <LOQ        | <LOQ, <LOQ, <LOQ, <LOQ     | n/a                          | n/a                            |
| <i>Ad libitum</i>                   | <LOQ, <LOQ, <LOQ, <LOQ        | <LOQ, <LOQ, <LOQ, <LOQ     | <LOQ, <LOQ, <LOQ, <LOQ       | 2.12, 2.18, 1.35, 2.73         |
| Hexaldehyde (1.200)                 |                               |                            |                              |                                |
| Baseline                            | <LOQ, <LOQ, <LOQ, <LOQ        | <LOQ, <LOQ, <LOQ, <LOQ     | <LOQ, <LOQ, <LOQ, <LOQ       | <LOQ, <LOQ, <LOQ, <LOQ         |
| Pre-defined                         | <LOQ, <LOQ, <LOQ, <LOQ        | <LOQ, <LOQ, <LOQ, <LOQ     | n/a                          | n/a                            |
| <i>Ad libitum</i>                   | 1.909, 2.667, 1.440, 2.263    | <LOQ, <LOQ, <LOQ, <LOQ     | <LOQ, <LOQ, <LOQ, <LOQ       | 3.485, 2.890, 3.035, 3.675     |
| Valeraldehyde (0.619)               |                               |                            |                              |                                |
| Baseline                            | <LOQ, <LOQ, <LOQ, <LOQ        | <LOQ, <LOQ, <LOQ, <LOQ     | <LOQ, <LOQ, <LOQ, <LOQ       | <LOQ, <LOQ, <LOQ, <LOQ         |
| Pre-defined                         | <LOQ, <LOQ, <LOQ, <LOQ        | <LOQ, <LOQ, <LOQ, <LOQ     | n/a                          | n/a                            |
| <i>Ad libitum</i>                   | <LOQ, <LOQ, <LOQ, <LOQ        | <LOQ, <LOQ, <LOQ, <LOQ     | <LOQ, <LOQ, <LOQ, <LOQ       | 6.24, 5.50, 5.35, 7.29         |
| 2,5-Dimethylbenzaldehyde (0.884)    |                               |                            |                              |                                |
| Baseline                            | <LOQ, <LOQ, <LOQ, <LOQ        | <LOQ, <LOQ, <LOQ, <LOQ     | <LOQ, <LOQ, <LOQ, <LOQ       | <LOQ, <LOQ, <LOQ, <LOQ         |
| Pre-defined                         | <LOQ, <LOQ, <LOQ, <LOQ        | <LOQ, <LOQ, <LOQ, <LOQ     | n/a                          | n/a                            |
| <i>Ad libitum</i>                   | <LOQ, <LOQ, <LOQ, <LOQ        | <LOQ, <LOQ, <LOQ, <LOQ     | <LOQ, <LOQ, <LOQ, <LOQ       | 5.46, 3.66, 4.01, 5.02         |
| Methyl ethyl ketone (1.45)          |                               |                            |                              |                                |
| Background before baseline          | 9.040, 4.610, 6.920, 6.290    | <LOQ, 3.540, 5.430, <LOQ   | 9.830, 11.600, 12.000, 9.250 | 8.190, 11.000, 9.900, 9.370    |
| Baseline                            | 6.040, 4.255, 4.970, 5.315    | 4.195, 4.150, 5.190, 2.900 | 7.070, 5.900, 6.360, 8.430   | 6.790, 7.550, 8.120, 7.720     |
| Background before pre-defined       | 7.640, 8.700, 6.800, 5.740    | 3.630, 5.020, 4.480, 4.840 | n/a                          | n/a                            |
| Pre-defined                         | 10.115, 6.385, 6.055, 6.030   | 4.435, 4.520, 4.530, 3.745 | n/a                          | n/a                            |
| Background before <i>ad libitum</i> | 11.200, 12.700, 13.200, 9.960 | 3.700, 4.770, 4.520, 8.820 | 7.890, 7.770, 7.160, 10.500  | 6.840, 7.740, 8.410, 7.020     |
| <i>Ad libitum</i>                   | 9.235, 7.885, 8.905, 10.055   | 5.205, 5.450, 6.505, 6.440 | 7.370, 6.270, 7.560, 8.630   | 21.200, 25.200, 25.800, 25.700 |
| Acrolein (0.619)                    |                               |                            |                              |                                |
| Baseline                            | <LOQ, <LOQ, <LOQ, <LOQ        | <LOQ, <LOQ, <LOQ, <LOQ     | <LOQ, <LOQ, <LOQ, <LOQ       | <LOQ, <LOQ, <LOQ, <LOQ         |
| Pre-defined                         | <LOQ, <LOQ, <LOQ, <LOQ        | <LOQ, <LOQ, <LOQ, <LOQ     | n/a                          | n/a                            |
| <i>Ad libitum</i>                   | <LOQ, <LOQ, <LOQ, <LOQ        | <LOQ, <LOQ, <LOQ, <LOQ     | <LOQ, <LOQ, <LOQ, <LOQ       | <LOQ, <LOQ, <LOQ, <LOQ         |
| 1,3-Butadiene (0.194)               |                               |                            |                              |                                |
| Baseline                            | <LOQ, <LOQ, <LOQ, <LOQ        | <LOQ, <LOQ, <LOQ, <LOQ     | <LOQ, <LOQ, <LOQ, <LOQ       | <LOQ, <LOQ, <LOQ, <LOQ         |

|                         |                            |                            |                            |                                    |
|-------------------------|----------------------------|----------------------------|----------------------------|------------------------------------|
| Pre-defined             | <LOQ, <LOQ, <LOQ, <LOQ     | <LOQ, <LOQ, <LOQ, <LOQ     | n/a                        | n/a                                |
| <i>Ad libitum</i>       | <LOQ, <LOQ, <LOQ, <LOQ     | <LOQ, <LOQ, <LOQ, <LOQ     | <LOQ, <LOQ, <LOQ, <LOQ     | 9.870, 10.310, 10.930, 11.110      |
| Benzene (0.281)         |                            |                            |                            |                                    |
| Baseline                | 0.586, 0.596, 0.545, 0.610 | 1.587, 1.582, 1.275, 1.278 | 0.975, 0.863, 0.924, 0.896 | 2.250, 2.273, 2.356, 2.195         |
| Pre-defined             | 0.846, 0.860, 0.806, 0.823 | 0.678, 0.692, 0.675, 0.684 | n/a                        | n/a                                |
| <i>Ad libitum</i>       | 0.538, 0.541, 0.536, 0.545 | 0.770, 0.775, 0.754, 0.511 | 1.059, 1.075, 1.068, 1.040 | 14.910, 15.370, 15.840, 15.910     |
| Isoprene (0.243)        |                            |                            |                            |                                    |
| Baseline                | 7.376, 7.118, 7.316, 8.138 | 6.373, 6.325, 6.482, 6.655 | 7.591, 7.346, 7.594, 7.755 | 7.633, 7.821, 7.900, 8.192         |
| Pre-defined             | 8.861, 9.109, 9.299, 9.554 | 6.932, 6.672, 7.079, 7.369 | n/a                        | n/a                                |
| <i>Ad libitum</i>       | 7.657, 7.929, 4.398, 8.345 | 7.027, 6.918, 7.363, 3.825 | 9.215, 9.160, 9.494, 9.772 | 166.400, 173.700, 176.900, 185.800 |
| Toluene (0.330)         |                            |                            |                            |                                    |
| Baseline                | 0.948, 1.296, 0.790, 1.329 | 2.390, 2.391, 1.857, 2.193 | 2.603, 1.658, 1.928, 1.901 | 4.045, 3.659, 4.002, 3.720         |
| Pre-defined             | 3.079, 3.456, 2.766, 2.672 | 0.411, <LOQ, <LOQ, 0.342   | n/a                        | n/a                                |
| <i>Ad libitum</i>       | 1.720, 1.614, 1.164, 1.590 | 0.662, 0.854, 0.769, 0.436 | 2.109, 2.273, 2.107, 2.113 | 33.260, 34.490, 35.170, 35.810     |
| Furan (0.178)           |                            |                            |                            |                                    |
| Baseline                | <LOQ, <LOQ, <LOQ, <LOQ     | <LOQ, <LOQ, <LOQ, <LOQ     | <LOQ, <LOQ, <LOQ, <LOQ     | <LOQ, <LOQ, <LOQ, <LOQ             |
| Pre-defined             | <LOQ, <LOQ, <LOQ, <LOQ     | <LOQ, <LOQ, <LOQ, <LOQ     | n/a                        | n/a                                |
| <i>Ad libitum</i>       | <LOQ, <LOQ, <LOQ, <LOQ     | <LOQ, <LOQ, <LOQ, <LOQ     | <LOQ, <LOQ, <LOQ, <LOQ     | 11.50, 11.99, 12.11, 12.71         |
| Ethylene oxide (0.628)  |                            |                            |                            |                                    |
| Baseline                | <LOQ, <LOQ, <LOQ, <LOQ     | <LOQ, <LOQ, <LOQ, <LOQ     | <LOQ, <LOQ, <LOQ, <LOQ     | <LOQ, <LOQ, <LOQ, <LOQ             |
| Pre-defined             | <LOQ, <LOQ, <LOQ, <LOQ     | <LOQ, <LOQ, <LOQ, <LOQ     | n/a                        | n/a                                |
| <i>Ad libitum</i>       | <LOQ, <LOQ, <LOQ, <LOQ     | <LOQ, <LOQ, <LOQ, <LOQ     | <LOQ, <LOQ, <LOQ, <LOQ     | <LOQ, <LOQ, <LOQ, <LOQ             |
| Vinyl chloride (0.222)  |                            |                            |                            |                                    |
| Baseline                | <LOQ, <LOQ, <LOQ, <LOQ     | <LOQ, <LOQ, <LOQ, <LOQ     | <LOQ, <LOQ, <LOQ, <LOQ     | <LOQ, <LOQ, <LOQ, <LOQ             |
| Pre-defined             | <LOQ, <LOQ, <LOQ, <LOQ     | <LOQ, <LOQ, <LOQ, <LOQ     | n/a                        | n/a                                |
| <i>Ad libitum</i>       | <LOQ, <LOQ, <LOQ, <LOQ     | <LOQ, <LOQ, <LOQ, <LOQ     | <LOQ, <LOQ, <LOQ, <LOQ     | <LOQ, <LOQ, <LOQ, 0.455            |
| Propylene oxide (0.826) |                            |                            |                            |                                    |
| Baseline                | <LOQ, <LOQ, <LOQ, <LOQ     | <LOQ, <LOQ, <LOQ, <LOQ     | <LOQ, <LOQ, <LOQ, <LOQ     | <LOQ, <LOQ, <LOQ, <LOQ             |



|                       |                        |                        |                        |                            |
|-----------------------|------------------------|------------------------|------------------------|----------------------------|
| Pre-defined           | <LOQ, <LOQ, <LOQ, <LOQ | <LOQ, <LOQ, <LOQ, <LOQ | n/a                    | n/a                        |
| <i>Ad libitum</i>     | <LOQ, <LOQ, <LOQ, <LOQ | <LOQ, <LOQ, <LOQ, <LOQ | <LOQ, <LOQ, <LOQ, <LOQ | <LOQ, <LOQ, <LOQ, <LOQ     |
| Nitromethane (4.33)   |                        |                        |                        |                            |
| Baseline              | <LOQ, <LOQ, <LOQ, <LOQ | <LOQ, <LOQ, <LOQ, <LOQ | <LOQ, <LOQ, <LOQ, <LOQ | <LOQ, <LOQ, <LOQ, <LOQ     |
| Pre-defined           | <LOQ, <LOQ, <LOQ, <LOQ | <LOQ, <LOQ, <LOQ, <LOQ | n/a                    | n/a                        |
| <i>Ad libitum</i>     | <LOQ, <LOQ, <LOQ, <LOQ | <LOQ, <LOQ, <LOQ, <LOQ | <LOQ, <LOQ, <LOQ, <LOQ | <LOQ, <LOQ, <LOQ, <LOQ     |
| 2-Nitropropane (6.33) |                        |                        |                        |                            |
| Baseline              | <LOQ, <LOQ, <LOQ, <LOQ | <LOQ, <LOQ, <LOQ, <LOQ | <LOQ, <LOQ, <LOQ, <LOQ | <LOQ, <LOQ, <LOQ, <LOQ     |
| Pre-defined           | <LOQ, <LOQ, <LOQ, <LOQ | <LOQ, <LOQ, <LOQ, <LOQ | n/a                    | n/a                        |
| <i>Ad libitum</i>     | <LOQ, <LOQ, <LOQ, <LOQ | <LOQ, <LOQ, <LOQ, <LOQ | <LOQ, <LOQ, <LOQ, <LOQ | <LOQ, <LOQ, <LOQ, <LOQ     |
| Vinyl acetate (6.11)  |                        |                        |                        |                            |
| Baseline              | <LOQ, <LOQ, <LOQ, <LOQ | <LOQ, <LOQ, <LOQ, <LOQ | <LOQ, <LOQ, <LOQ, <LOQ | <LOQ, <LOQ, <LOQ, <LOQ     |
| Pre-defined           | <LOQ, <LOQ, <LOQ, <LOQ | <LOQ, <LOQ, <LOQ, <LOQ | n/a                    | n/a                        |
| <i>Ad libitum</i>     | <LOQ, <LOQ, <LOQ, <LOQ | <LOQ, <LOQ, <LOQ, <LOQ | <LOQ, <LOQ, <LOQ, <LOQ | <LOQ, <LOQ, <LOQ, <LOQ     |
| Ethylbenzene (0.378)  |                        |                        |                        |                            |
| Baseline              | <LOQ, <LOQ, <LOQ, <LOQ | <LOQ, <LOQ, <LOQ, <LOQ | <LOQ, <LOQ, <LOQ, <LOQ | 1.096, 1.074, 1.140, 1.081 |
| Pre-defined           | <LOQ, <LOQ, <LOQ, <LOQ | <LOQ, <LOQ, <LOQ, <LOQ | n/a                    | n/a                        |
| <i>Ad libitum</i>     | <LOQ, <LOQ, <LOQ, <LOQ | <LOQ, <LOQ, <LOQ, <LOQ | <LOQ, <LOQ, <LOQ, <LOQ | 4.421, 4.566, 4.722, 4.771 |

Note: N: number of participants in the group; n/a: not applicable; NR: not reportable, compound was not quantifiable due to unknown matrix interferences; <LOQ: below the level of quantification.

**Table S3.** Absolute levels of nicotine, propylene glycol and glycerol ( $\mu\text{g}/\text{cm}^2$ ) in each surface sample location during each product use condition

| Constituent (LOQ $\mu\text{g}/\text{cm}^2$ ) | Group I   |           |           |           |           | Group II  |           |           |           | Group III |           |           |           | Group IV  |          |           |  |
|----------------------------------------------|-----------|-----------|-----------|-----------|-----------|-----------|-----------|-----------|-----------|-----------|-----------|-----------|-----------|-----------|----------|-----------|--|
|                                              | (N=9)     |           |           |           |           | (N=9)     |           |           |           | (N=9)     |           |           |           | (N=10)    |          |           |  |
| Condition                                    | Sampl e 1 | Sampl e 2 | Sampl e 3 | Sampl e 4 | Sampl e 1 | Sampl e 2 | Sampl e 3 | Sampl e 4 | Sampl e 1 | Sampl e 2 | Sampl e 3 | Sampl e 4 | Samp le 1 | Samp le 2 | Sample 3 | Samp le 4 |  |
| <b>Nicotine (0.00126)</b>                    |           |           |           |           |           |           |           |           |           |           |           |           |           |           |          |           |  |

|                                  |         |        |        |        |        |        |        |        |        |       |       |        |      |      |         |      |      |
|----------------------------------|---------|--------|--------|--------|--------|--------|--------|--------|--------|-------|-------|--------|------|------|---------|------|------|
| Baseline                         | <LOQ    | <LOQ   | <LOQ   | <LOQ   | <LOQ   | <LOQ   | <LOQ   | <LOQ   | <LOQ   | <LOQ  | <LOQ  | <LOQ   | <LOQ | <LOQ | <LOQ    | <LOQ | <LOQ |
| Pre-defined                      | 0.00308 | <LOQ   | <LOQ   | <LOQ   | <LOQ   | <LOQ   | <LOQ   | <LOQ   | n/a    | n/a   | n/a   | n/a    | n/a  | n/a  | n/a     | n/a  | n/a  |
| <i>Ad libitum</i>                | <LOQ    | <LOQ   | <LOQ   | <LOQ   | <LOQ   | <LOQ   | <LOQ   | <LOQ   | <LOQ   | <LOQ  | <LOQ  | <LOQ   | <LOQ | <LOQ | 0.00437 | <LOQ | <LOQ |
| <b>Propylene glycol (0.0185)</b> |         |        |        |        |        |        |        |        |        |       |       |        |      |      |         |      |      |
| Baseline                         | <LOQ    | <LOQ   | <LOQ   | <LOQ   | <LOQ   | <LOQ   | <LOQ   | <LOQ   | <LOQ   | <LOQ  | <LOQ  | <LOQ   | <LOQ | <LOQ | <LOQ    | <LOQ | <LOQ |
| Pre-defined                      | 0.0249  | 0.0189 | 0.0201 | <LOQ   | <LOQ   | <LOQ   | 0.0194 | <LOQ   | n/a    | n/a   | n/a   | n/a    | n/a  | n/a  | n/a     | n/a  | n/a  |
| <i>Ad libitum</i>                | <LOQ    | <LOQ   | <LOQ   | <LOQ   | 0.0262 | 0.0253 | <LOQ   | <LOQ   | <LOQ   | <LOQ  | <LOQ  | <LOQ   | <LOQ | <LOQ | <LOQ    | <LOQ | <LOQ |
| <b>Glycerol (0.0209)</b>         |         |        |        |        |        |        |        |        |        |       |       |        |      |      |         |      |      |
| Baseline                         | <LOQ    | <LOQ   | <LOQ   | <LOQ   | <LOQ   | <LOQ   | <LOQ   | <LOQ   | <LOQ   | <LOQ  | <LOQ  | <LOQ   | <LOQ | <LOQ | <LOQ    | <LOQ | <LOQ |
| Pre-defined                      | <LOQ    | <LOQ   | <LOQ   | <LOQ   | 0.0819 | 0.0829 | 0.078  | 0.0321 | n/a    | n/a   | n/a   | n/a    | n/a  | n/a  | n/a     | n/a  | n/a  |
| <i>Ad libitum</i>                | 0.025   | <LOQ   | 0.0258 | 0.0281 | <LOQ   | <LOQ   | <LOQ   | <LOQ   | 0.2701 | 0.511 | 0.325 | 0.2395 | <LOQ | <LOQ | <LOQ    | <LOQ | <LOQ |

Note: N: number of participants in the group; n/a: not applicable; LOQ: limit of quantification.
